# Supplementary material
Source: ML conference proceedings conference paper supplement (https://openaccess.thecvf.com/content/CVPR2021/html/Tartaglione_EnD_Entangling_and_CVPR_2021_paper.html)
Supplement: Supplementary file 1 [file Tartaglione_EnD_Entangling_and_CVPR_2021_supplemental.pdf]

# EnD: Entangling and Disentangling deep representations for bias correction

## Supplementary material

Enzo Tartaglione\*, Carlo Alberto Barbano\*, Marco Grangetto\*

enzo.tartaglione@unito.it, carlo.barbano@unito.it, marco.grangetto@unito.it

\*University of Turin, Computer Science Department

### 1. Experiments details

In this section we provide the technical details of our experiments, including the hyperparameter values, the validation setup and the optimization techniques we use.

#### 1.1. Biased MNIST

Following Bahng *et al.* [2], we use the Adam optimizer with a learning rate of 0.0001, a weight decay of  $10^{-4}$  and a batch size of 256. We train for 80 epochs. We do not use any data augmentation scheme. We use 30% of the training set as validation set, and we colorize it using a  $\rho$  value of 0.1. The EnD hyperparameters  $\alpha$  and  $\beta$  are searched using the Bayesian optimization [7] implementation provided by *Weights and Biases* [3] on the validation set. For  $\rho \in \{0.990, 0.995, 0.997\}$ ,  $\alpha$  and  $\beta$  are searched in the interval  $[0; 1]$ , for  $\rho = 0.999$  in  $[0; 50]$ . To provide a mean performance along with the standard deviation, we select the top 3 models based on the best validation accuracy obtained, and we report the average accuracy on the final test set.

#### 1.2. CelebA

Following Nam *et al.* [6], we use the Adam optimizer with a learning rate of 0.001, a batch size of 256, and a weight decay of  $10^{-4}$ . We train for 50 epochs. Images are resized to  $224 \times 224$  and augmented with random horizontal flip. To construct the validation set, we sample  $N$  images from each pair  $(t, b)$  of the training set, where  $N$  is 20% the size of the least populated group  $(t, b)$ . The EnD hyperparameters  $\alpha$  and  $\beta$  are searched using the Bayesian optimization [7] implementation provided by *Weights and Biases* [3] on the validation set, in the interval  $[0; 50]$ . To provide a mean performance along with the standard deviation, we select the top 3 models based on the best validation accuracy obtained, and we report the average accuracy on the final test sets.

#### 1.3. IMDB Face

We use the Adam optimizer with a learning rate of 0.001, a batch size of 256 and a weight decay of  $10^{-4}$ . We train for 50 epochs. As with CelebA, images are resized to  $224 \times 224$  and randomly flipped at training time for augmentation. In this case, it is not possible to construct a validation set including samples from both EB1 and EB2, without altering the test set composition. Hence, we perform a 4-fold cross validation for every experiment. For example, when training on EB1, we use one fold of EB2 as validation set and the remaining three folds as EB2 test set. We repeat this process until each EB2 fold is used both as validation and as test set. The same process is repeated when training on EB2, by splitting EB1 in validation and test folds. When training for age prediction, we follow Kim *et al.* [5], by binning the age values in the intervals 0-19, 20-24, 25-29, 30-34, 34-39, 40-44, 45-49, 50-54, 55-59, 60-64, 65-69, 70-100, proposed by Alvi *et al.* [1]. For every fold, the EnD hyperparameters  $\alpha$  and  $\beta$  are searched using the Bayesian optimization [7] implementation provided by *Weights and Biases* [3] on the validation set, in the interval  $[0; 50]$ . To provide a mean performance along with the standard deviation, we select the top model for each fold, based on the best validation accuracy obtained. We report the accuracy obtained on the final test sets, as average accuracy among the different folds.

#### 1.4. CORDA

We use standard SGD as optimization technique, with a learning rate of 0.01, decayed by a factor 0.1 every 15 epochs, a weight decay of  $10^{-5}$ , and a batch size chosen among  $\{4, 8, 16, 32\}$ . We train for 50 epochs. Images are resized to  $500 \times 500$  and a center crop is taken, with size  $448 \times 448$ . The network encoder is pre-trained on the publicly available CheXpert [4] dataset. To build the validation set, we use 20% of CORDA-CDSS and 20% of CORDA-SLG. The EnD hyperparameters  $\alpha$  and  $\beta$  are searched using the Bayesian optimization [7] implementation provided by *Weights and Biases* [3] on the validation set, in the inter-

val [0; 50]. To provide a mean performance along with the standard deviation, we select the top 3 models based on the best validation accuracy obtained, and we report the average accuracy on the final test sets.

## 2. Source code

Source code for the EnD technique, including the Biased MNIST example, can be found in the at <https://github.com/EIDOSlab/entangling-disentangling-bias>.

## References

- [1] Mohsan Alvi, Andrew Zisserman, and Christoffer Nellåker. Turning a blind eye: Explicit removal of biases and variation from deep neural network embeddings. In *Proceedings of the European Conference on Computer Vision (ECCV)*, pages 0–0, 2018. 1
- [2] Hyojin Bahng, Sanghyuk Chun, Sangdoon Yun, Jaegul Choo, and Seong Joon Oh. Learning de-biased representations with biased representations. In *International Conference on Machine Learning (ICML)*, 2020. 1
- [3] Lukas Biewald. Experiment tracking with weights and biases, 2020. Software available from wandb.com. 1
- [4] Jeremy Irvin, Pranav Rajpurkar, Michael Ko, Yifan Yu, Silvana Ciurea-Ilcus, Chris Chute, Henrik Marklund, Behzad Haghgoo, Robyn Ball, Katie Shpanskaya, et al. Chexpert: A large chest radiograph dataset with uncertainty labels and expert comparison. In *Proceedings of the AAAI Conference on Artificial Intelligence*, volume 33, pages 590–597, 2019. 1
- [5] Byungju Kim, Hyunwoo Kim, Kyungsu Kim, Sungjin Kim, and Junmo Kim. Learning not to learn: Training deep neural networks with biased data. In *The IEEE Conference on Computer Vision and Pattern Recognition (CVPR)*, June 2019. 1
- [6] Junhyun Nam, Hyuntak Cha, Sungsoo Ahn, Jaeho Lee, and Jinwoo Shin. Learning from failure: Training de-biased classifier from biased classifier. In *Advances in Neural Information Processing Systems*, 2020. 1
- [7] Jasper Snoek, Hugo Larochelle, and Ryan P Adams. Practical bayesian optimization of machine learning algorithms. In *Advances in neural information processing systems*, pages 2951–2959, 2012. 1
